# Supplementary material for: Risk Factors Associated With SARS-CoV-2 Infection Among Farmworkers in Monterey County, California
Source: PubMed Central journal article supplement (PMC8444020; doi:10.1001/jamanetworkopen.2021.24116), 2021-09-15

## Supplemental Online Content

Mora AM, Lewnard JA, Kogut K, et al; for the CHAMACOS-Project-19 Study Team. Risk factors associated with SARS-CoV-2 infection among farmworkers in Monterey County, California. *JAMA Netw Open*. 2021;4(9):e2124116. doi:10.1001/jamanetworkopen.2021.24116

**eTable 1.** Sociodemographic and Health-Related Risk Factors for TMA and IgG Positivity Among Farmworkers, Monterey County, 2020

**eTable 2.** Household and Community Risk Factors for TMA and IgG Positivity Among Farmworkers, Monterey County, 2020

**eTable 3.** Work-Related Risk Factors for TMA and IgG Positivity Among Farmworkers, Monterey County, 2020

**eTable 4.** Employer-Provided Preventive Measures and Their Association With TMA and IgG Positivity Among Farmworkers, Monterey County, 2020

**eFigure.** Correlation Heat Map of Risk Factors Associated With TMA and IgG Positivity Among Farmworkers, Monterey County, 2020

This supplemental material has been provided by the authors to give readers additional information about their work.

**eTable 1.** Sociodemographic and Health-Related Risk Factors for TMA and IgG Positivity Among Farmworkers, Monterey County, 2020

| Attribute                                    | TMA-positive SARS-CoV-2 infection  |                                    |                                    | IgG-positive SARS-CoV-2 infection   |                                    |                                    |
|----------------------------------------------|------------------------------------|------------------------------------|------------------------------------|-------------------------------------|------------------------------------|------------------------------------|
|                                              | All enrolled                       | Yes                                | No                                 | All enrolled                        | Yes                                | No                                 |
|                                              | N=911<br><i>n</i> (%) or<br>M ± SD | N=118<br><i>n</i> (%) or<br>M ± SD | N=793<br><i>n</i> (%) or<br>M ± SD | N=1058<br><i>n</i> (%) or<br>M ± SD | N=201<br><i>n</i> (%) or<br>M ± SD | N=857<br><i>n</i> (%) or<br>M ± SD |
| Recruitment site                             |                                    |                                    |                                    |                                     |                                    |                                    |
| Clinics                                      | 515 (56.5)                         | 95 (80.5)                          | 420 (53.0)                         | 526 (49.7)                          | 97 (48.3)                          | 429 (50.1)                         |
| Community outreach                           | 396 (43.5)                         | 23 (19.5)                          | 373 (47.0)                         | 532 (50.3)                          | 104 (51.7)                         | 428 (49.9)                         |
| Agricultural work in the preceding two weeks |                                    |                                    |                                    |                                     |                                    |                                    |
| No                                           | --                                 | --                                 | --                                 | 193 (18.2)                          | 45 (22.4)                          | 148 (17.3)                         |
| Yes                                          | 911 (100.0)                        | 118 (100.0)                        | 793 (100.0)                        | 865 (81.8)                          | 156 (77.6)                         | 709 (82.7)                         |
| Sex                                          |                                    |                                    |                                    |                                     |                                    |                                    |
| Female                                       | 460 (50.5)                         | 60 (50.8)                          | 393 (49.6)                         | 547 (51.7)                          | 99 (49.3)                          | 448 (52.3)                         |
| Male                                         | 451 (49.5)                         | 58 (49.2)                          | 400 (50.4)                         | 511 (48.3)                          | 102 (50.7)                         | 409 (47.7)                         |
| Age (years)                                  | 39.6 ± 12.2                        | 39.6 ± 11.0                        | 39.6 ± 12.4                        | 39.6 ± 12.6                         | 39.6 ± 12.3                        | 39.6 ± 12.6                        |
| 18-29                                        | 225 (24.7)                         | 27 (22.9)                          | 198 (25.0)                         | 263 (24.9)                          | 43 (21.4)                          | 220 (25.7)                         |
| 30-39                                        | 224 (24.6)                         | 29 (24.6)                          | 195 (24.6)                         | 262 (24.8)                          | 59 (29.4)                          | 203 (23.7)                         |
| 40-49                                        | 256 (28.1)                         | 42 (35.6)                          | 214 (27.0)                         | 284 (26.8)                          | 59 (29.4)                          | 225 (26.3)                         |
| 50-59                                        | 157 (17.2)                         | 16 (13.6)                          | 141 (17.8)                         | 186 (17.6)                          | 27 (13.4)                          | 159 (18.6)                         |
| ≥60                                          | 49 (5.4)                           | 4 (3.4)                            | 45 (5.7)                           | 63 (6.0)                            | 13 (6.5)                           | 50 (5.8)                           |
| Education                                    |                                    |                                    |                                    |                                     |                                    |                                    |
| Primary school complete or less              | 409 (44.9)                         | 63 (53.6)                          | 346 (43.6)                         | 472 (44.6)                          | 100 (49.8)                         | 372 (43.4)                         |
| More than primary school                     | 501 (55.0)                         | 55 (46.6)                          | 446 (56.2)                         | 585 (55.3)                          | 101(50.2)                          | 484 (56.5)                         |
| No answer                                    | 1 (0.1)                            | 0 (0.0)                            | 1 (0.1)                            | 1 (0.1)                             | 0 (0.0)                            | 1 (0.1)                            |
| Marital status                               |                                    |                                    |                                    |                                     |                                    |                                    |
| Not married or living as married             | 327 (35.9)                         | 50 (42.4)                          | 277 (34.9)                         | 388 (36.7)                          | 69 (34.3)                          | 319 (37.2)                         |
| Married or living as married                 | 583 (64.0)                         | 67 (56.8)                          | 516 (65.1)                         | 669 (63.2)                          | 132 (65.7)                         | 537 (62.7)                         |
| No answer                                    | 1 (0.1)                            | 1 (0.8)                            | 0 (0.0)                            | 1 (0.1)                             | 0 (0.0)                            | 1 (0.1)                            |
| Annual household income                      |                                    |                                    |                                    |                                     |                                    |                                    |
| <\$25,000                                    | 456 (50.1)                         | 66 (55.9)                          | 390 (49.2)                         | 536 (50.7)                          | 101 (50.2)                         | 435 (50.8)                         |
| ≥\$25,000                                    | 415 (45.6)                         | 48 (40.7)                          | 367 (46.3)                         | 466 (44.0)                          | 86 (42.8)                          | 380 (44.3)                         |
| No answer                                    | 40 (4.4)                           | 4 (3.4)                            | 36 (4.5)                           | 56 (5.3)                            | 14 (7.0)                           | 42 (4.9)                           |
| Language spoken at home                      |                                    |                                    |                                    |                                     |                                    |                                    |
| Spanish                                      | 772 (84.7)                         | 96 (81.4)                          | 676 (85.2)                         | 896 (84.7)                          | 166 (82.6)                         | 730 (85.2)                         |
| English                                      | 42 (4.6)                           | 0 (0.0)                            | 42 (5.3)                           | 55 (5.2)                            | 12 (6.0)                           | 43 (5.0)                           |
| Indigenous                                   | 97 (10.7)                          | 22 (18.6)                          | 75 (9.5)                           | 107 (10.1)                          | 23 (11.4)                          | 84 (9.8)                           |
| No answer                                    | 0 (0.0)                            | 0 (0.0)                            | 0 (0.0)                            | 0 (0.0)                             | 0 (0.0)                            | 0 (0.0)                            |

|                             |             |             |             |             |             |             |
|-----------------------------|-------------|-------------|-------------|-------------|-------------|-------------|
| Country of birth            |             |             |             |             |             |             |
| Mexico                      | 773 (84.9)  | 104 (88.1)  | 669 (84.4)  | 884 (83.6)  | 163 (81.1)  | 721 (84.1)  |
| US                          | 100 (11.0)  | 7 (5.9)     | 93 (11.7)   | 135 (12.8)  | 31 (15.4)   | 104 (12.1)  |
| Other                       | 38 (4.2)    | 7 (5.9)     | 31 (3.9)    | 39 (3.7)    | 7 (3.5)     | 32 (3.7)    |
| Years in US                 | 20.9 ± 11.1 | 20.2 ± 10.9 | 21.0 ± 11.2 | 21.3 ± 11.1 | 21.3 ± 10.6 | 21.2 ± 11.3 |
| <15                         | 231 (25.4)  | 38 (32.2)   | 193 (24.3)  | 255 (24.1)  | 46 (22.9)   | 209 (24.4)  |
| 15-19                       | 164 (18.0)  | 17 (14.4)   | 147 (18.5)  | 183 (17.3)  | 44 (21.9)   | 139 (16.2)  |
| 20-29                       | 252 (27.7)  | 34 (28.8)   | 218 (27.5)  | 281 (26.6)  | 49 (24.4)   | 232 (27.1)  |
| ≥30                         | 164 (18.0)  | 22 (18.6)   | 142 (17.9)  | 203 (19.2)  | 31 (15.4)   | 172 (20.1)  |
| Entire life                 | 100 (11.0)  | 7 (5.9)     | 93 (11.7)   | 135 (12.8)  | 31 (15.4)   | 104 (12.1)  |
| No answer                   | 0 (0.0)     | 0 (0.0)     | 0 (0.0)     | 1 (0.1)     | 0 (0.0)     | 1 (0.1)     |
| Community of residence      |             |             |             |             |             |             |
| Salinas                     | 383 (42.0)  | 40 (33.9)   | 343 (43.3)  | 468 (44.2)  | 99 (49.3)   | 369 (34.1)  |
| Greenfield                  | 283 (31.1)  | 56 (47.5)   | 227 (28.6)  | 297 (28.1)  | 63 (31.3)   | 234 (27.3)  |
| Other town                  | 245 (26.9)  | 22 (18.6)   | 223 (28.1)  | 293 (27.7)  | 39 (19.4)   | 254 (29.6)  |
| Smoking                     |             |             |             |             |             |             |
| Never smoked                | 729 (80.0)  | 99 (83.9)   | 630 (79.5)  | 855 (80.8)  | 157 (78.1)  | 698 (81.4)  |
| Former smoker               | 140 (15.4)  | 16 (13.6)   | 124 (15.6)  | 154 (14.6)  | 36 (17.9)   | 118 (13.8)  |
| Current smoker              | 41 (4.5)    | 3 (2.5)     | 38 (4.8)    | 48 (4.5)    | 8 (4.0)     | 40 (4.7)    |
| No answer                   | 1 (0.1)     | 0 (0.0)     | 1 (0.1)     | 1 (0.1)     | 0 (0.0)     | 1 (0.1)     |
| Body mass index (measured)  | 29.6 ± 5.5  | 29.2 ± 4.7  | 29.7 ± 5.6  | 29.6 ± 5.5  | 30.4 ± 5.4  | 29.4 ± 5.5  |
| <25 (underweight or normal) | 167 (18.3)  | 18 (15.3)   | 149 (18.8)  | 192 (18.1)  | 24 (11.9)   | 168 (19.6)  |
| 25-29.9 (overweight)        | 347 (38.1)  | 45 (38.1)   | 302 (38.1)  | 404 (38.2)  | 75 (37.3)   | 329 (38.4)  |
| ≥30 (obese)                 | 375 (41.2)  | 49 (41.5)   | 326 (41.1)  | 437 (41.3)  | 95 (47.3)   | 342 (39.9)  |
| Not collected               | 22 (2.4)    | 6 (5.1)     | 16 (2.0)    | 25 (2.4)    | 7 (3.5)     | 18 (2.1)    |
| Self-reported hypertension  |             |             |             |             |             |             |
| No                          | 786 (86.3)  | 106 (89.8)  | 680 (85.8)  | 915 (86.5)  | 171 (85.1)  | 744 (86.8)  |
| Yes                         | 122 (13.4)  | 12 (10.2)   | 110 (13.9)  | 139 (13.1)  | 29 (14.4)   | 110 (12.8)  |
| No answer                   | 3 (0.3)     | 0 (0.0)     | 3 (0.4)     | 4 (0.4)     | 1 (0.5)     | 3 (0.4)     |
| Self-reported diabetes      |             |             |             |             |             |             |
| No                          | 803 (88.1)  | 109 (92.4)  | 694 (87.5)  | 934 (88.3)  | 172 (85.6)  | 762 (88.9)  |
| Yes                         | 105 (11.5)  | 9 (7.6)     | 96 (12.1)   | 120 (11.3)  | 28 (13.9)   | 92 (10.7)   |
| No answer                   | 3 (0.3)     | 0 (0.0)     | 3 (0.4)     | 4 (0.4)     | 1 (0.5)     | 3 (0.4)     |

**eTable 2.** Household and Community Risk Factors for TMA and IgG Positivity Among Farmworkers, Monterey County, 2020

| Attribute                         | TMA-positive SARS-CoV-2 infection  |                                    |                                    | IgG-positive SARS-CoV-2 infection   |                                    |                                    |
|-----------------------------------|------------------------------------|------------------------------------|------------------------------------|-------------------------------------|------------------------------------|------------------------------------|
|                                   | All enrolled                       | Yes                                | No                                 | All enrolled                        | Yes                                | No                                 |
|                                   | N=911<br><i>n</i> (%) or<br>M ± SD | N=118<br><i>n</i> (%) or<br>M ± SD | N=793<br><i>n</i> (%) or<br>M ± SD | N=1058<br><i>n</i> (%) or<br>M ± SD | N=201<br><i>n</i> (%) or<br>M ± SD | N=857<br><i>n</i> (%) or<br>M ± SD |
| Type of housing                   |                                    |                                    |                                    |                                     |                                    |                                    |
| House                             | 443 (48.6)                         | 60 (50.8)                          | 383 (48.3)                         | 490 (46.3)                          | 101 (50.2)                         | 389 (45.4)                         |
| Apartment                         | 372 (40.8)                         | 48 (40.7)                          | 324 (40.9)                         | 468 (44.2)                          | 85 (42.3)                          | 383 (44.7)                         |
| Hotel or motel                    | 36 (4.0)                           | 6 (5.1)                            | 30 (3.8)                           | 37 (3.5)                            | 5 (2.5)                            | 32 (3.7)                           |
| Trailer or mobile home            | 39 (4.3)                           | 3 (2.5)                            | 36 (4.5)                           | 41 (3.9)                            | 8 (4.0)                            | 33 (3.9)                           |
| Other                             | 21 (2.3)                           | 1 (0.8)                            | 20 (2.5)                           | 22 (2.1)                            | 2 (1.0)                            | 20 (2.3)                           |
| Household size                    | 5.4 ± 2.3                          | 5.5 ± 2.4                          | 5.4 ± 2.3                          | 5.5 ± 2.6                           | 5.9 ± 2.6*                         | 5.4 ± 2.6                          |
| 0 others                          | 11 (1.2)                           | 2 (1.7)                            | 9 (1.1)                            | 12 (1.1)                            | 3 (1.5)                            | 9 (1.1)                            |
| 1-3 others                        | 331 (36.3)                         | 41 (34.7)                          | 290 (36.6)                         | 379 (35.8)                          | 58 (28.9)                          | 321 (37.5)                         |
| 4-6 others                        | 414 (45.4)                         | 51 (43.2)                          | 363 (45.8)                         | 486 (45.9)                          | 93 (46.3)                          | 393 (45.9)                         |
| ≥7 others                         | 155 (17.0)                         | 24 (20.3)                          | 131 (16.5)                         | 181 (17.1)                          | 47 (23.4)                          | 134 (15.6)                         |
| Children <18 living in the home   |                                    |                                    |                                    |                                     |                                    |                                    |
| No                                | 235 (25.8)                         | 28 (23.7)                          | 207 (26.1)                         | 268 (25.3)                          | 43 (21.4)                          | 225 (26.3)                         |
| Yes                               | 675 (74.1)                         | 90 (76.3)                          | 585 (73.8)                         | 789 (74.6)                          | 157 (78.1)                         | 632 (73.7)                         |
| No answer                         | 1 (0.1)                            | 0 (0.0)                            | 1 (0.1)                            | 1 (0.1)                             | 1 (0.5)                            | 0 (0.0)                            |
| Children ≤5 living in the home    |                                    |                                    |                                    |                                     |                                    |                                    |
| No                                | 577 (63.3)                         | 79 (66.9)                          | 498 (62.8)                         | 669 (63.2)                          | 110 (54.7)                         | 559 (65.2)                         |
| Yes                               | 334 (36.7)                         | 39 (33.1)                          | 295 (37.2)                         | 389 (36.8)                          | 91 (45.3)                          | 298 (34.8)                         |
| Children attending school/daycare |                                    |                                    |                                    |                                     |                                    |                                    |
| No                                | 831 (91.2)                         | 105 (89.0)                         | 726 (91.6)                         | 976 (92.2)                          | 184 (91.5)                         | 792 (92.4)                         |
| Yes                               | 76 (8.3)                           | 12 (10.2)                          | 64 (8.1)                           | 78 (7.4)                            | 16 (8.0)                           | 62 (7.2)                           |
| No answer                         | 4 (0.4)                            | 1 (0.8)                            | 3 (0.4)                            | 4 (0.4)                             | 1 (0.5)                            | 3 (0.4)                            |
| Living with unrelated roommates   |                                    |                                    |                                    |                                     |                                    |                                    |
| No                                | 732 (80.4)                         | 93 (78.8)                          | 639 (80.6)                         | 860 (81.3)                          | 156 (77.6)                         | 704 (82.1)                         |
| Yes                               | 179 (19.6)                         | 25 (21.2)                          | 154 (19.4)                         | 198 (18.7)                          | 45 (22.4)                          | 153 (17.9)                         |
| Living with other farmworkers     |                                    |                                    |                                    |                                     |                                    |                                    |
| No                                | 224 (24.6)                         | 26 (22.0)                          | 198 (25.0)                         | 267 (25.2)                          | 49 (24.4)                          | 218 (25.4)                         |
| Yes                               | 684 (75.1)                         | 92 (78.0)                          | 592 (74.7)                         | 788 (74.5)                          | 151 (75.1)                         | 637 (74.3)                         |
| No answer                         | 3 (0.3)                            | 0 (0.0)                            | 3 (0.4)                            | 3 (0.3)                             | 1 (0.5)                            | 2 (0.2)                            |
| Household crowding                |                                    |                                    |                                    |                                     |                                    |                                    |
| ≤2 persons per bedroom            | 576 (63.2)                         | 71 (60.2)                          | 505 (63.7)                         | 666 (62.9)                          | 113 (56.2)                         | 553 (64.5)                         |
| >2 persons per bedroom            | 335 (36.8)                         | 47 (39.8)                          | 288 (36.3)                         | 392 (37.1)                          | 88 (43.8)                          | 304 (35.5)                         |

|                                                                                      |            |            |            |             |            |            |
|--------------------------------------------------------------------------------------|------------|------------|------------|-------------|------------|------------|
| <hr/>                                                                                |            |            |            |             |            |            |
| Access to washing machine at home                                                    |            |            |            |             |            |            |
| No                                                                                   | 345 (37.9) | 49 (41.5)  | 296 (37.3) | 395 (37.3)  | 77 (38.3)  | 318 (37.1) |
| Yes                                                                                  | 566 (62.1) | 69 (58.5)  | 497 (62.7) | 663 (62.7)  | 124 (61.7) | 539 (62.9) |
| Left home for non-essential reasons (past 2 weeks)                                   |            |            |            |             |            |            |
| No                                                                                   | 797 (87.5) | 104 (88.1) | 693 (87.4) | 914 (86.4)  | 169 (84.1) | 745 (86.9) |
| Yes                                                                                  | 109 (12.0) | 12 (10.2)  | 97 (12.2)  | 138 (13.0)  | 29 (14.4)  | 109 (12.7) |
| No answer                                                                            | 5 (0.5)    | 2 (1.7)    | 3 (0.4)    | 6 (0.6)     | 3 (1.5)    | 3 (0.4)    |
| Used public transportation/ride share services (past 2 weeks)                        |            |            |            |             |            |            |
| No                                                                                   | 858 (94.2) | 113 (95.8) | 745 (93.9) | 990 (93.6)  | 189 (94.0) | 801 (93.5) |
| Yes                                                                                  | 48 (5.3)   | 3 (2.5)    | 45 (5.7)   | 62 (5.9)    | 9 (4.5)    | 53 (6.2)   |
| No answer                                                                            | 5 (0.5)    | 2 (1.7)    | 3 (0.4)    | 6 (0.6)     | 3 (1.5)    | 3 (0.4)    |
| Attended social gatherings with non-household members (past 2 weeks)                 |            |            |            |             |            |            |
| No                                                                                   | 819 (89.9) | 105 (89.0) | 714 (90.0) | 949 (89.7)  | 181 (90.0) | 768 (89.6) |
| Yes                                                                                  | 90 (9.9)   | 13 (11.0)  | 77 (9.7)   | 108 (10.2)  | 20 (10.0)  | 88 (10.3)  |
| No answer                                                                            | 2 (0.2)    | 0 (0.0)    | 2 (0.3)    | 1 (0.1)     | 0 (0.0)    | 1 (0.1)    |
| Attended indoor gatherings with non-household members (past 2 weeks)                 |            |            |            |             |            |            |
| No                                                                                   | 862 (94.6) | 109 (92.4) | 753 (95.0) | 999 (94.4)  | 192 (95.5) | 807 (94.2) |
| Yes                                                                                  | 47 (5.2)   | 9 (7.6)    | 38 (4.8)   | 58 (5.5)    | 9 (4.5)    | 49 (5.7)   |
| No answer                                                                            | 2 (0.2)    | 0 (0.0)    | 2 (0.3)    | 1 (0.1)     | 0 (0.0)    | 1 (0.1)    |
| Face covering use while less than 6 feet away from others all of the time            |            |            |            |             |            |            |
| No                                                                                   | 74 (8.1)   | 4 (3.4)    | 70 (8.8)   | 81 (7.7)    | 13 (6.5)   | 68 (7.9)   |
| Yes                                                                                  | 837 (91.9) | 114 (96.6) | 723 (91.2) | 977 (92.3)  | 188 (93.5) | 789 (92.1) |
| Hand washing when returning home or after touching something all or most of the time |            |            |            |             |            |            |
| No                                                                                   | 27 (3.0)   | 3 (2.5)    | 24 (3.0)   | 31 (2.9)    | 5 (2.5)    | 26 (3.0)   |
| Yes                                                                                  | 884 (97.0) | 115 (97.5) | 769 (97.0) | 1027 (97.1) | 196 (97.5) | 831 (97.0) |
| Possible exposure to someone with COVID-19 at home in the past 2 weeks <sup>a</sup>  |            |            |            |             |            |            |
| No                                                                                   | 804 (88.3) | 79 (66.9)  | 725 (91.4) | 945 (89.3)  | 178 (88.6) | 767 (89.5) |
| <hr/>                                                                                |            |            |            |             |            |            |

|                                                                                                 |            |           |            |            |            |            |
|-------------------------------------------------------------------------------------------------|------------|-----------|------------|------------|------------|------------|
| Yes                                                                                             | 107 (11.7) | 39 (33.1) | 68 (8.6)   | 113 (10.7) | 23 (11.4)  | 90 (10.5)  |
| Possible exposure to someone with COVID-19 at home since the start of the pandemic <sup>b</sup> |            |           |            |            |            |            |
| No                                                                                              | 743 (81.6) | 68 (57.6) | 675 (85.1) | 875 (82.7) | 152 (75.6) | 723 (84.4) |
| Yes                                                                                             | 168 (18.4) | 50 (42.4) | 118 (14.9) | 183 (17.3) | 49 (24.4)  | 134 (15.6) |

<sup>a</sup>Lived with someone who had COVID-19 symptoms or positive in the past 2 weeks.

<sup>b</sup>Lived with someone who had COVID-19 symptoms or positive since the start of the pandemic.

**eTable 3.** Work-Related Risk Factors for TMA and IgG Positivity Among Farmworkers, Monterey County, 2020

| Attribute                                                         | TMA-positive SARS-CoV-2 infection  |                                    |                                    | IgG-positive SARS-CoV-2 infection   |                                    |                                    |
|-------------------------------------------------------------------|------------------------------------|------------------------------------|------------------------------------|-------------------------------------|------------------------------------|------------------------------------|
|                                                                   | All enrolled                       | Yes                                | No                                 | All enrolled                        | Yes                                | No                                 |
|                                                                   | N=911<br><i>n</i> (%) or<br>M ± SD | N=118<br><i>n</i> (%) or<br>M ± SD | N=793<br><i>n</i> (%) or<br>M ± SD | N=1058<br><i>n</i> (%) or<br>M ± SD | N=201<br><i>n</i> (%) or<br>M ± SD | N=857<br><i>n</i> (%) or<br>M ± SD |
| H2A visa holder                                                   |                                    |                                    |                                    |                                     |                                    |                                    |
| No                                                                | 840 (92.2)                         | 107 (90.7)                         | 733 (92.4)                         | 980 (92.6)                          | 188 (93.5)                         | 792 (92.4)                         |
| Yes                                                               | 60 (6.6)                           | 9 (7.6)                            | 51 (6.4)                           | 65 (6.1)                            | 11 (5.5)                           | 54 (6.3)                           |
| No answer                                                         | 11 (1.2)                           | 2 (1.7)                            | 9 (1.1)                            | 13 (1.2)                            | 2 (1.0)                            | 11 (1.3)                           |
| Supervisor or mayordomo                                           |                                    |                                    |                                    |                                     |                                    |                                    |
| No                                                                | 867 (95.2)                         | 111 (94.1)                         | 756 (95.3)                         | 967 (91.4)                          | 183 (91.0)                         | 784 (91.5)                         |
| Yes                                                               | 44 (4.8)                           | 7 (5.9)                            | 37 (4.7)                           | 49 (4.6)                            | 9 (4.5)                            | 40 (4.7)                           |
| No answer                                                         | 0 (0.0)                            | 0 (0.0)                            | 0 (0.0)                            | 42 (4.0)                            | 9 (4.5)                            | 33 (3.9)                           |
| Type of agricultural work (ever/in the past 2 weeks) <sup>a</sup> |                                    |                                    |                                    |                                     |                                    |                                    |
| Working in the fields                                             | 680 (74.6)                         | 100 (84.8)                         | 580 (73.1)                         | 795 (75.1)                          | 162 (80.6)                         | 633 (73.9)                         |
| Packing shed                                                      | 105 (11.5)                         | 11 (9.3)                           | 94 (11.9)                          | 128 (12.1)                          | 21 (10.5)                          | 107 (12.5)                         |
| Processing facility                                               | 57 (6.3)                           | 4 (3.4)                            | 53 (6.7)                           | 58 (5.5)                            | 7 (3.5)                            | 51 (6.0)                           |
| Nursery                                                           | 33 (3.6)                           | 4 (3.4)                            | 29 (3.7)                           | 35 (3.3)                            | 4 (2.0)                            | 31 (3.6)                           |
| Truck driver                                                      | 33 (3.6)                           | 4 (3.4)                            | 29 (3.7)                           | 33 (3.1)                            | 3 (1.5)                            | 30 (3.5)                           |
| Packing truck                                                     | 21 (2.3)                           | 1 (0.9)                            | 20 (2.5)                           | 21 (2.0)                            | 2 (1.0)                            | 19 (2.2)                           |
| Other                                                             | 19 (2.1)                           | 1 (0.9)                            | 18 (2.3)                           | 19 (1.8)                            | 2 (1.0)                            | 17 (2.0)                           |
| No answer                                                         | 1 (0.1)                            | 0 (0.0)                            | 1 (0.1)                            | 10 (1.0)                            | 2 (1.0)                            | 8 (0.9)                            |
| Worked indoors                                                    |                                    |                                    |                                    |                                     |                                    |                                    |
| No                                                                | 687 (75.5)                         | 98 (93.1)                          | 589 (74.3)                         | 812 (76.7)                          | 166 (82.6)                         | 646 (75.4)                         |
| Yes                                                               | 223 (24.5)                         | 20 (16.9)                          | 203 (25.6)                         | 245 (23.2)                          | 35 (17.4)                          | 210 (24.5)                         |
| No answer                                                         | 1 (0.1)                            | 0 (0.0)                            | 1 (0.1)                            | 1 (0.1)                             | 0 (0.0)                            | 1 (0.1)                            |
| Crops (ever/in the past 2 weeks) <sup>a</sup>                     |                                    |                                    |                                    |                                     |                                    |                                    |
| Berries                                                           | 195 (28.7)                         | 14 (14.0)                          | 181 (31.2)                         | 233 (29.3)                          | 39 (24.1)                          | 194 (30.7)                         |
| Leafy greens                                                      | 173 (25.4)                         | 31 (31.0)                          | 142 (24.5)                         | 207 (26.0)                          | 50 (30.9)                          | 157 (24.8)                         |
| Broccoli                                                          | 148 (21.8)                         | 28 (28.0)                          | 120 (20.7)                         | 147 (18.5)                          | 24 (14.8)                          | 123 (19.4)                         |
| Grapes                                                            | 47 (6.9)                           | 10 (10.0)                          | 37 (6.4)                           | 57 (7.2)                            | 15 (9.3)                           | 42 (6.6)                           |
| Peas                                                              | 52 (7.7)                           | 16 (16.0)                          | 36 (6.2)                           | 50 (6.3)                            | 5 (3.1)                            | 45 (7.1)                           |
| Cauliflower                                                       | 37 (5.4)                           | 5 (5.0)                            | 32 (5.5)                           | 36 (4.5)                            | 11 (6.8)                           | 25 (4.0)                           |
| Celery                                                            | 17 (2.5)                           | 2 (2.0)                            | 15 (2.6)                           | 16 (2.0)                            | 3 (1.9)                            | 13 (2.1)                           |
| Artichokes                                                        | 5 (0.7)                            | 0 (0.0)                            | 5 (0.9)                            | 6 (0.8)                             | 1 (0.6)                            | 5 (0.8)                            |
| Other                                                             | 107 (15.7)                         | 9 (9.0)                            | 98 (16.9)                          | 155 (19.5)                          | 35 (21.6)                          | 120 (19.0)                         |

|                                                                                                 |            |            |            |            |            |            |
|-------------------------------------------------------------------------------------------------|------------|------------|------------|------------|------------|------------|
| Commuted to work with non-household members                                                     |            |            |            |            |            |            |
| No                                                                                              | 595 (65.3) | 65 (55.1)  | 530 (66.8) | 672 (63.5) | 124 (61.7) | 548 (63.9) |
| Yes                                                                                             | 316 (34.7) | 53 (44.9)  | 263 (33.2) | 366 (34.6) | 72 (35.8)  | 294 (34.3) |
| No answer                                                                                       | 0 (0.0)    | 0 (0.0)    | 0 (0.0)    | 20 (1.9)   | 5 (2.5)    | 15 (1.8)   |
| Used face covering at work all of the time                                                      |            |            |            |            |            |            |
| No                                                                                              | 94 (10.3)  | 11 (9.3)   | 83 (10.5)  | 105 (9.9)  | 19 (9.5)   | 86 (10.0)  |
| Yes                                                                                             | 816 (89.6) | 107 (90.7) | 709 (89.4) | 950 (89.8) | 182 (90.5) | 768 (89.6) |
| No answer                                                                                       | 1 (0.1)    | 0 (0.0)    | 1 (0.1)    | 3 (0.3)    | 0 (0.0)    | 3 (0.4)    |
| Came within 6 feet from others while working                                                    |            |            |            |            |            |            |
| No                                                                                              | 413 (45.3) | 52 (44.1)  | 361 (45.5) | 483 (45.7) | 95 (47.3)  | 388 (45.3) |
| Yes                                                                                             | 477 (52.4) | 64 (54.2)  | 413 (52.1) | 538 (50.9) | 97 (48.3)  | 441 (51.5) |
| No answer                                                                                       | 21 (2.3)   | 2 (1.7)    | 19 (2.4)   | 37 (3.5)   | 9 (4.5)    | 28 (3.3)   |
| Possible exposure to someone with COVID-19 at work in the past 2 weeks <sup>b</sup>             |            |            |            |            |            |            |
| No                                                                                              | 763 (83.8) | 83 (70.3)  | 680 (85.8) | 922 (87.1) | 178 (88.6) | 744 (86.8) |
| Yes                                                                                             | 148 (16.2) | 35 (29.7)  | 113 (14.2) | 136 (12.9) | 23 (11.4)  | 113 (13.2) |
| No answer                                                                                       | 0 (0.0)    | 0 (0.0)    | 0 (0.0)    | 0 (0.0)    | 0 (0.0)    | 0 (0.0)    |
| Possible exposure to someone with COVID-19 at work since the start of the pandemic <sup>c</sup> |            |            |            |            |            |            |
| No                                                                                              | 523 (57.4) | 52 (44.1)  | 471 (59.4) | 641 (60.6) | 117 (58.2) | 524 (61.1) |
| Yes                                                                                             | 388 (42.6) | 66 (55.9)  | 322 (40.6) | 417 (39.4) | 84 (41.8)  | 333 (38.9) |
| No answer                                                                                       | 0 (0.0)    | 0 (0.0)    | 0 (0.0)    | 0 (0.0)    | 0 (0.0)    | 0 (0.0)    |

<sup>a</sup>Bivariate analyses compared each agricultural job with all other jobs and working in each crop with working in all other crops. We note that some participants worked in a variety of jobs and crops.

<sup>b</sup>Worked with someone who had COVID-19 symptoms, tested positive for SARS-CoV-2, or who quarantined in the past 2 weeks.

<sup>c</sup>Worked with someone who had COVID-19 symptoms, tested positive for SARS-CoV-2, or who quarantined since the start of the pandemic.



**eTable 4.** Employer-Provided Preventive Measures and Their Association With TMA and IgG Positivity Among Farmworkers, Monterey County, 2020

| Attribute                                              | TMA-positive SARS-CoV-2 infection  |                                    |                                    | IgG-positive SARS-CoV-2 infection   |                                    |                                    |
|--------------------------------------------------------|------------------------------------|------------------------------------|------------------------------------|-------------------------------------|------------------------------------|------------------------------------|
|                                                        | All enrolled                       | Yes                                | No                                 | All enrolled                        | Yes                                | No                                 |
|                                                        | N=911<br><i>n</i> (%) or<br>M ± SD | N=118<br><i>n</i> (%) or<br>M ± SD | N=793<br><i>n</i> (%) or<br>M ± SD | N=1058<br><i>n</i> (%) or<br>M ± SD | N=201<br><i>n</i> (%) or<br>M ± SD | N=857<br><i>n</i> (%) or<br>M ± SD |
| Fever and symptoms screening upon arrival at workplace |                                    |                                    |                                    |                                     |                                    |                                    |
| Neither                                                | 326 (35.8)                         | 54 (45.8)                          | 272 (34.3)                         | 480 (45.4)                          | 92 (45.8)                          | 388 (45.3)                         |
| Either or both                                         | 585 (64.2)                         | 64 (54.2)                          | 521 (65.7)                         | 577 (54.5)                          | 109 (54.2)                         | 468 (54.6)                         |
| No answer                                              | 0 (0.0)                            | 0 (0.0)                            | 0 (0.0)                            | 1 (0.1)                             | 0 (0.0)                            | 1 (0.1)                            |
| Employer provided face coverings                       |                                    |                                    |                                    |                                     |                                    |                                    |
| No                                                     | 124 (13.6)                         | 15 (12.7)                          | 109 (13.7)                         | 162 (15.3)                          | 26 (12.9)                          | 136 (15.9)                         |
| Yes                                                    | 783 (86.0)                         | 102 (86.4)                         | 681 (85.9)                         | 889 (84.0)                          | 174 (86.6)                         | 715 (83.4)                         |
| No answer                                              | 4 (0.4)                            | 1 (0.9)                            | 3 (0.4)                            | 7 (0.7)                             | 1 (0.5)                            | 6 (0.7)                            |
| Employer provided gloves                               |                                    |                                    |                                    |                                     |                                    |                                    |
| No                                                     | 133 (14.6)                         | 12 (10.2)                          | 121 (15.3)                         | 152 (14.4)                          | 26 (12.9)                          | 126 (14.7)                         |
| Yes                                                    | 777 (85.3)                         | 106 (89.8)                         | 671 (84.6)                         | 905 (85.5)                          | 175 (87.1)                         | 730 (85.2)                         |
| No answer                                              | 1 (0.1)                            | 0 (0.0)                            | 1 (0.1)                            | 1 (0.1)                             | 0 (0.0)                            | 1 (0.1)                            |
| Employer provided eye shields                          |                                    |                                    |                                    |                                     |                                    |                                    |
| No                                                     | 444 (48.7)                         | 52 (44.1)                          | 392 (49.4)                         | 518 (49.0)                          | 94 (46.8)                          | 424 (49.5)                         |
| Yes                                                    | 466 (51.2)                         | 66 (55.9)                          | 400 (50.4)                         | 539 (50.9)                          | 107 (53.2)                         | 432 (50.4)                         |
| No answer                                              | 1 (0.1)                            | 0 (0.0)                            | 1 (0.1)                            | 1 (0.1)                             | 0 (0.0)                            | 1 (0.1)                            |
| Employer provided hand washing stations                |                                    |                                    |                                    |                                     |                                    |                                    |
| No                                                     | 5 (0.6)                            | 1 (0.8)                            | 4 (0.5)                            | 6 (0.6)                             | 2 (1.0)                            | 4 (0.5)                            |
| Yes                                                    | 905 (99.3)                         | 117 (99.2)                         | 788 (99.4)                         | 1051 (99.3)                         | 199 (99.0)                         | 852 (99.4)                         |
| No answer                                              | 1 (0.1)                            | 0 (0.0)                            | 1 (0.1)                            | 1 (0.1)                             | 0 (0.0)                            | 1 (0.1)                            |
| Employer provided liquid soap and paper towels         |                                    |                                    |                                    |                                     |                                    |                                    |
| No                                                     | 12 (1.3)                           | 2 (1.7)                            | 10 (1.3)                           | 15 (1.4)                            | 4 (2.0)                            | 11 (1.3)                           |
| Yes                                                    | 897 (98.5)                         | 116 (98.3)                         | 781 (98.5)                         | 1041 (98.4)                         | 196 (97.5)                         | 845 (98.6)                         |
| No answer                                              | 2 (0.2)                            | 0 (0.0)                            | 2 (0.3)                            | 2 (0.2)                             | 1 (0.5)                            | 1 (0.1)                            |
| Employer provided hand sanitizer                       |                                    |                                    |                                    |                                     |                                    |                                    |
| No                                                     | 70 (7.7)                           | 8 (6.8)                            | 62 (7.8)                           | 89 (8.4)                            | 20 (10.0)                          | 69 (9.1)                           |
| Yes                                                    | 840 (92.2)                         | 110 (93.2)                         | 730 (92.1)                         | 968 (91.5)                          | 181 (90.0)                         | 787 (91.8)                         |
| No answer                                              | 1 (0.1)                            | 0 (0.0)                            | 1 (0.1)                            | 1 (0.1)                             | 0 (0.0)                            | 1 (0.1)                            |

|                                                                                                    |            |            |            |             |            |            |
|----------------------------------------------------------------------------------------------------|------------|------------|------------|-------------|------------|------------|
| <hr/>                                                                                              |            |            |            |             |            |            |
| Workplace surfaces and tools regularly disinfected and kept clean                                  |            |            |            |             |            |            |
| No                                                                                                 | 94 (10.3)  | 12 (10.2)  | 82 (10.3)  | 115 (10.9)  | 17 (8.5)   | 98 (11.4)  |
| Yes                                                                                                | 785 (86.2) | 98 (83.1)  | 687 (86.6) | 905 (85.5)  | 175 (87.1) | 730 (85.2) |
| No answer                                                                                          | 32 (3.5)   | 8 (6.8)    | 24 (3.0)   | 38 (3.6)    | 9 (4.5)    | 29 (3.4)   |
| Employer staggered breaks to reduce exposure                                                       |            |            |            |             |            |            |
| No                                                                                                 | 494 (54.2) | 66 (55.9)  | 428 (54.0) | 583 (55.1)  | 112 (55.7) | 471 (55.0) |
| Yes                                                                                                | 413 (45.3) | 51 (43.2)  | 362 (45.6) | 469 (44.3)  | 89 (44.3)  | 380 (44.3) |
| No answer                                                                                          | 4 (0.4)    | 1 (0.9)    | 3 (0.4)    | 6 (0.6)     | 0 (0.0)    | 6 (0.7)    |
| Employer provided information on COVID-19 symptoms                                                 |            |            |            |             |            |            |
| No                                                                                                 | 40 (4.4)   | 6 (5.1)    | 34 (4.3)   | 62 (5.9)    | 17 (8.5)   | 45 (5.3)   |
| Yes                                                                                                | 870 (95.5) | 112 (94.9) | 758 (95.6) | 993 (93.9)  | 184 (91.5) | 809 (94.4) |
| No answer                                                                                          | 1 (0.1)    | 0 (0.0)    | 1 (0.1)    | 3 (0.3)     | 0 (0.0)    | 3 (0.4)    |
| Employer provided information on how to protect themselves at work                                 |            |            |            |             |            |            |
| No                                                                                                 | 21 (2.3)   | 1 (0.8)    | 20 (2.5)   | 35 (3.3)    | 12 (6.0)   | 23 (2.7)   |
| Yes                                                                                                | 889 (97.6) | 117 (99.2) | 772 (97.4) | 1020 (96.4) | 189 (94.0) | 831 (97.0) |
| No answer                                                                                          | 1 (0.11)   | 0 (0.0)    | 1 (0.1)    | 3 (0.3)     | 0 (0.0)    | 3 (0.4)    |
| Employer provided information on how to protect themselves at home and in the community            |            |            |            |             |            |            |
| No                                                                                                 | 47 (5.2)   | 3 (2.5)    | 44 (5.6)   | 67 (6.3)    | 17 (8.5)   | 50 (5.8)   |
| Yes                                                                                                | 863 (94.7) | 115 (97.5) | 748 (94.3) | 988 (93.4)  | 184 (91.5) | 804 (93.8) |
| No answer                                                                                          | 1 (0.11)   | 0 (0.0)    | 1 (0.1)    | 3 (0.3)     | 0 (0.0)    | 3 (0.4)    |
| Employer provided information on whom to call if they were sick                                    |            |            |            |             |            |            |
| No                                                                                                 | 99 (10.9)  | 18 (15.3)  | 81 (10.2)  | 129 (12.2)  | 27 (13.4)  | 102 (11.9) |
| Yes                                                                                                | 811 (89.0) | 100 (84.7) | 711 (89.7) | 926 (87.5)  | 174 (86.6) | 752 (87.7) |
| No answer                                                                                          | 1 (0.11)   | 0 (0.0)    | 1 (0.1)    | 3 (0.3)     | 0 (0.0)    | 3 (0.4)    |
| Employer provided information on their ability to get free testing and treatment if they were sick |            |            |            |             |            |            |
| No                                                                                                 | 237 (26.0) | 31 (26.3)  | 206 (26.0) | 289 (27.3)  | 62 (30.8)  | 227 (26.5) |
| Yes                                                                                                | 672 (73.8) | 87 (73.7)  | 585 (73.8) | 765 (72.3)  | 138 (68.7) | 627 (73.2) |
| No answer                                                                                          | 2 (0.2)    | 0 (0.0)    | 2 (0.3)    | 4 (0.4)     | 1 (0.5)    | 3 (0.4)    |
| <hr/>                                                                                              |            |            |            |             |            |            |

|                                                                                                              |            |            |            |            |            |            |
|--------------------------------------------------------------------------------------------------------------|------------|------------|------------|------------|------------|------------|
| Employer provided information on where to get housing if they needed to quarantine or isolate away from home |            |            |            |            |            |            |
| No                                                                                                           | 498 (54.7) | 70 (59.3)  | 428 (54.0) | 579 (54.7) | 112 (55.7) | 467 (54.5) |
| Yes                                                                                                          | 411 (45.1) | 48 (40.7)  | 363 (45.8) | 475 (44.9) | 88 (43.8)  | 387 (45.2) |
| No answer                                                                                                    | 2 (0.22)   | 0 (0.0)    | 2 (0.3)    | 4 (0.4)    | 1 (0.5)    | 3 (0.4)    |
| Employer provided information on the importance of staying away from work if they were sick                  |            |            |            |            |            |            |
| No                                                                                                           | 55 (6.0)   | 5 (4.2)    | 50 (6.3)   | 77 (7.3)   | 15 (7.5)   | 62 (7.2)   |
| Yes                                                                                                          | 854 (93.7) | 113 (95.8) | 741 (93.4) | 976 (92.3) | 185 (92.0) | 791 (92.3) |
| No answer                                                                                                    | 2 (0.2)    | 0 (0.0)    | 2 (0.3)    | 5 (0.5)    | 1 (0.5)    | 4 (0.5)    |
| Employer provided information on their benefit to get paid to stay away from work if they were sick          |            |            |            |            |            |            |
| No                                                                                                           | 263 (28.9) | 36 (30.5)  | 227 (28.6) | 316 (29.9) | 58 (28.9)  | 258 (30.1) |
| Yes                                                                                                          | 646 (70.9) | 82 (69.5)  | 564 (71.1) | 738 (69.8) | 142 (70.6) | 596 (69.5) |
| No answer                                                                                                    | 2 (0.2)    | 0 (0.0)    | 2 (0.3)    | 4 (0.4)    | 1 (0.5)    | 3 (0.4)    |
| Received education about COVID-19 from medical staff at workplace                                            |            |            |            |            |            |            |
| No                                                                                                           | 584 (64.1) | 76 (64.4)  | 508 (64.1) | 682 (64.5) | 126 (62.7) | 556 (64.9) |
| Yes                                                                                                          | 312 (34.2) | 41 (34.8)  | 271 (34.2) | 356 (33.6) | 73 (36.3)  | 283 (33.0) |
| No answer                                                                                                    | 15 (1.7)   | 1 (0.8)    | 14 (1.8)   | 20 (1.9)   | 2 (1.0)    | 18 (2.1)   |

**eFigure.** Correlation Heat Map of Risk Factors Associated With TMA and IgG Positivity Among Farmworkers, Monterey County, 2020 (n=1107)

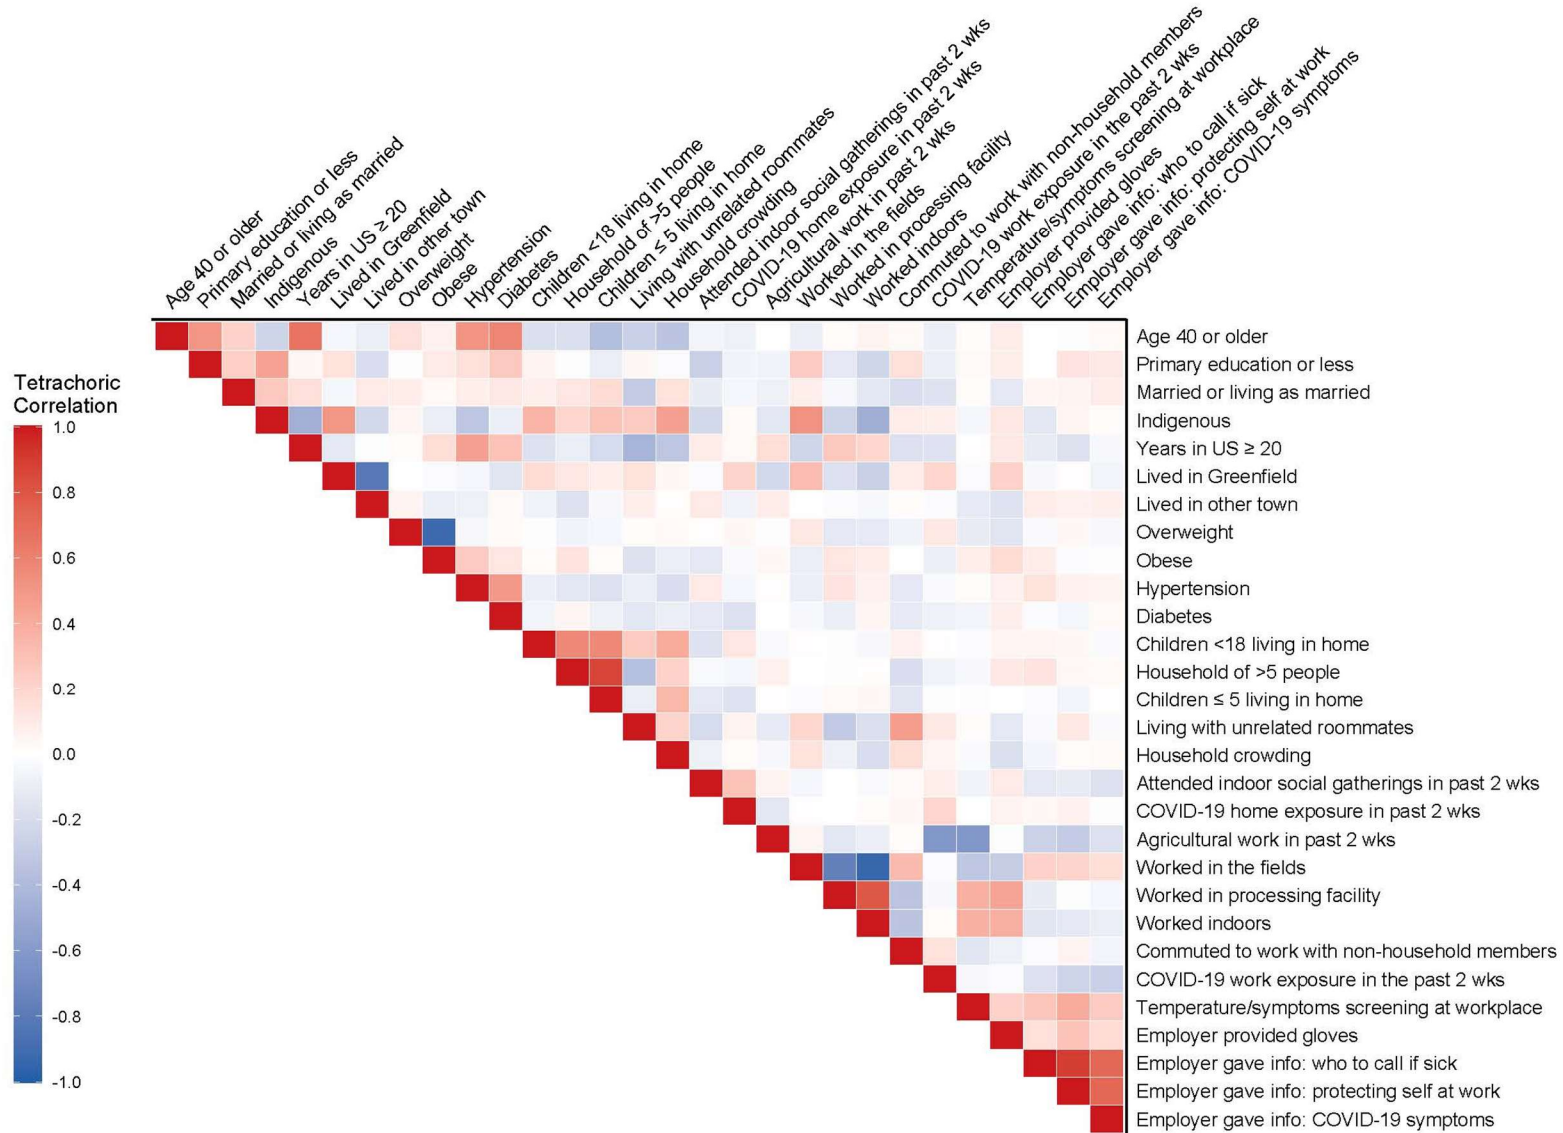

Supplement: jamanetwopen-e2124116-s001.pdf [file jamanetwopen-e2124116-s001.pdf]
