# Supplementary material for: Risk Factors Associated With SARS-CoV-2 Infection Among Farmworkers in Monterey County, California
Source: PubMed Central journal article supplement (PMC8444020; doi:10.1001/jamanetworkopen.2021.24116), 2021-09-15
Supplement: jamanetwopen-e2124116-s002.pdf [file jamanetwopen-e2124116-s002.pdf]

| <b>*Group Name(s): CHAMACOS-Project-19 Study Team</b> |                   |                              |                  |                                          |                                          |                                                         |                                                                                            |
|-------------------------------------------------------|-------------------|------------------------------|------------------|------------------------------------------|------------------------------------------|---------------------------------------------------------|--------------------------------------------------------------------------------------------|
| <b>*First Name and Middle Initial(s)</b>              | <b>*Last Name</b> | <b>*Suffix (eg, Jr, III)</b> | Academic Degrees | Institution                              | Location (city, state/province, country) | Role or Contribution, eg, chair, principal investigator | Group (if more than 1 Group listed in the byline) and/or Subgroup (eg, Steering Committee) |
| Jose                                                  | Camacho           |                              | High school      | Clinica de Salud del Valle de Salinas    | Salinas, CA                              |                                                         |                                                                                            |
| Gardenia                                              | Casillas          |                              | BA               | Clinica de Salud del Valle de Salinas    | Salinas, CA                              |                                                         |                                                                                            |
| Celeste                                               | Castro            |                              | High school      | Clinica de Salud del Valle de Salinas    | Salinas, CA                              |                                                         |                                                                                            |
| Madison J                                             | de Vere           |                              | High school      | University of California, Berkeley       | Berkeley, CA                             |                                                         |                                                                                            |
| Lupe                                                  | Flores            |                              | High school      | Clinica de Salud del Valle de Salinas    | Salinas, CA                              |                                                         |                                                                                            |
| Lizari                                                | Garcia            |                              | BA               | Clinica de Salud del Valle de Salinas    | Salinas, CA                              |                                                         |                                                                                            |
| Maria                                                 | Reina Garcia      |                              | BS               | Clinica de Salud del Valle de Salinas    | Salinas, CA                              |                                                         |                                                                                            |
| Terry                                                 | Gomez             |                              | High school      | Clinica de Salud del Valle de Salinas    | Salinas, CA                              |                                                         |                                                                                            |
| Carly                                                 | Hyland            |                              | MS               | University of California, Berkeley       | Berkeley, CA                             |                                                         |                                                                                            |
| Daniel                                                | Lampert           |                              | BA               | University of California, Berkeley       | Berkeley, CA                             |                                                         |                                                                                            |
| Aaron                                                 | McDowell-Sanchez  |                              | BS               | Clinica de Salud del Valle de Salinas    | Salinas, CA                              |                                                         |                                                                                            |
| Dominic                                               | Pina Montes       |                              | BA               | University of California, Berkeley       | Berkeley, CA                             |                                                         |                                                                                            |
| Jacqueline                                            | Montoya           |                              | High school      | Clinica de Salud del Valle de Salinas    | Salinas, CA                              |                                                         |                                                                                            |
| Norma                                                 | Morga             |                              | High school      | Clinica de Salud del Valle de Salinas    | Salinas, CA                              |                                                         |                                                                                            |
| Oguchi                                                | Nkwocha           |                              | MS, MD           | Clinica de Salud del Valle de Salinas    | Salinas, CA                              |                                                         |                                                                                            |
| Lilibeth                                              | Nunez             |                              | High school      | Clinica de Salud del Valle de Salinas    | Salinas, CA                              |                                                         |                                                                                            |
| Lizbeth                                               | Ortiz-Pivaral     |                              | High school      | University of California, Berkeley       | Berkeley, CA                             |                                                         |                                                                                            |
| Juanita "Liz"                                         | Orozco            |                              | BS               | Clinica de Salud del Valle de Salinas    | Salinas, CA                              |                                                         |                                                                                            |
| Marbel                                                | Orozco            |                              | High school      | California State University Monterey Bay | Seaside, CA                              |                                                         |                                                                                            |
| Kimberly L                                            | Parra             |                              | MPH              | Clinica de Salud del Valle de Salinas    | Salinas, CA                              |                                                         |                                                                                            |
| Nargis                                                | Rezai             |                              | High school      | California State University Monterey Bay | Seaside, CA                              |                                                         |                                                                                            |
| Maria T                                               | Rodriguez         |                              | BS               | Clinica de Salud del Valle de Salinas    | Salinas, CA                              |                                                         |                                                                                            |
| Monica                                                | Romero            |                              | BA               | Clinica de Salud del Valle de Salinas    | Salinas, CA                              |                                                         |                                                                                            |
| Hina                                                  | Sheth             |                              | RN               | Clinica de Salud del Valle de Salinas    | Salinas, CA                              |                                                         |                                                                                            |
| Jon                                                   | Yoshiyama         |                              | MD               | Clinica de Salud del Valle de Salinas    | Salinas, CA                              |                                                         |                                                                                            |
| Litzi                                                 | Zepeda            |                              | High school      | Clinica de Salud del Valle de Salinas    | Salinas, CA                              |                                                         |                                                                                            |
